# Supplementary material
Source: Research Square preprint supplement (doi:10.21203/rs.3.rs-8891938/v1)
Supplement: Supplementary file 1 [file d7499760ae7a04e59db9d34c.docx]

**EXPLORING HEALTHCARE FINANCING: A COMPREHENSIVE ANALYSIS OF INSURANCE SYSTEMS AND THEIR IMPACT ON ACCESS, QUALITY, AND AFFORDABILITY IN THE SULTANATE OF OMAN**

**Stakeholder Interview Guide and Ethical Documentation**

**Interview Details**

**Interview with:** Ms. ____________
**Designation:** Ministry of Health (MOH)
**Date:**
**Stakeholder Category:** Government – Health Financing Authority

Additional Stakeholders Interviewed:

- Ministry of Health (MOH)
- Insurance Companies
- Public and Private Hospitals
- Financial Services Authority (FSA)

**Section A: Semi-Structured Interview Guide**

**1. Current Healthcare Financing System**

- What are the primary sources of healthcare funding in Oman (government budget, private sector, out-of-pocket payments, employer-based insurance)?
- How is the healthcare budget allocated across:
  - Primary care
  - Secondary care
  - Tertiary hospitals
  - Preventive services?
- What is the current total health expenditure as a percentage of GDP?
- How has healthcare financing evolved over the past decade?

**2. Challenges and Financial Sustainability**

- What are the major challenges in sustaining Oman’s predominantly government-funded healthcare system?
- How does the Ministry address rising healthcare costs related to:
  - Population aging?
  - Increasing burden of non-communicable diseases (NCDs)?
- Are there funding gaps affecting specific populations (e.g., expatriates, rural communities)?
- What fiscal pressures affect long-term sustainability?

**3. Efficiency and Cost Management**

- What strategies are used to ensure efficient allocation of resources?
- Are there cost-control mechanisms such as:
  - Centralized procurement?
  - Generic medicine policies?
  - Digital health systems?
- Does the Ministry conduct cost-effectiveness or economic evaluations before introducing new programs?
- How is waste reduction monitored?

**4. Policy Reforms and Insurance Development**

- Are there plans to expand mandatory health insurance schemes?
- How does the Ministry coordinate with:
  - Private insurers?
  - Employers?
  - Hospitals?
- What is the regulatory role of the Financial Services Authority in supervising insurance markets?
- Is Oman moving toward a mixed financing model?

**5. Revenue Generation and Diversification**

- Are there strategies to generate additional healthcare revenue (e.g., sin taxes, public-private partnerships, premium contributions)?
- Is diversification of funding sources a policy priority?
- How can public-private partnerships improve financing sustainability?

**6. Equity and Accessibility**

- How does financing policy ensure equitable access between rural and urban populations?
- What protections exist to prevent catastrophic health expenditure?
- Are vulnerable populations subsidized?
- How does financing affect service quality and waiting times?

**7. Future Outlook (5–10 Years)**

- What are the Ministry’s key priorities for healthcare financing reform?
- How will emerging medical technologies impact healthcare costs?
- Is there a long-term transition plan toward insurance-based financing?

**8. Data, Monitoring, and KPIs**

- What key performance indicators (KPIs) are used to evaluate financing performance?
  - Out-of-pocket expenditure rate
  - Government health expenditure ratio
  - Insurance coverage rate
  - Financial protection indicators
- How is financing data collected and integrated into policy decisions?
- Are national health accounts regularly updated?

**9. Lessons and Innovation**

- Are there international financing models being studied?
- What innovative mechanisms (digital insurance platforms, risk pooling, value-based payments) are under consideration?
- What lessons can Oman adopt from regional health insurance reforms?

**Section B: Live Interview Documentation Template**

**Interview Record Sheet**

- Date:
- Location:
- Mode (Physical/Online):
- Duration:
- Interviewer:
- Interviewee:
- Key Themes Identified:
- Major Policy Insights:
- Observed Challenges:
- Proposed Reforms:

**Section C: Informed Consent Form**

**Research Title:**

**Exploring Healthcare Financing: A Comprehensive Analysis of Insurance Systems and Their Impact on Access, Quality, and Affordability in the Sultanate of Oman**

**Purpose of the Study**

This research aims to analyze Oman’s healthcare financing system, particularly insurance reforms, and assess their impact on access, quality, and affordability.

**Participation**

- Participation is voluntary.
- The interview will last approximately 30–60 minutes.
- Responses will be used strictly for academic research purposes.

**Confidentiality**

- Data will be anonymized unless explicit permission is granted.
- No personal identifiers will be published without consent.
- Data will be securely stored.

**Risks and Benefits**

- No anticipated physical or psychological risk.
- Findings may contribute to policy improvement.

**Consent Statement**

I confirm that:

- I have read and understood the study information.
- I voluntarily agree to participate.
- I understand I may withdraw at any time.

Name: ____________________
Designation: ____________________
Signature: ____________________
Date: ____________________

Researcher Name: Neetu Kwatra
Signature: ____________________
